# Supplementary material
Source: Research Square preprint supplement (doi:10.21203/rs.3.rs-8518691/v1)

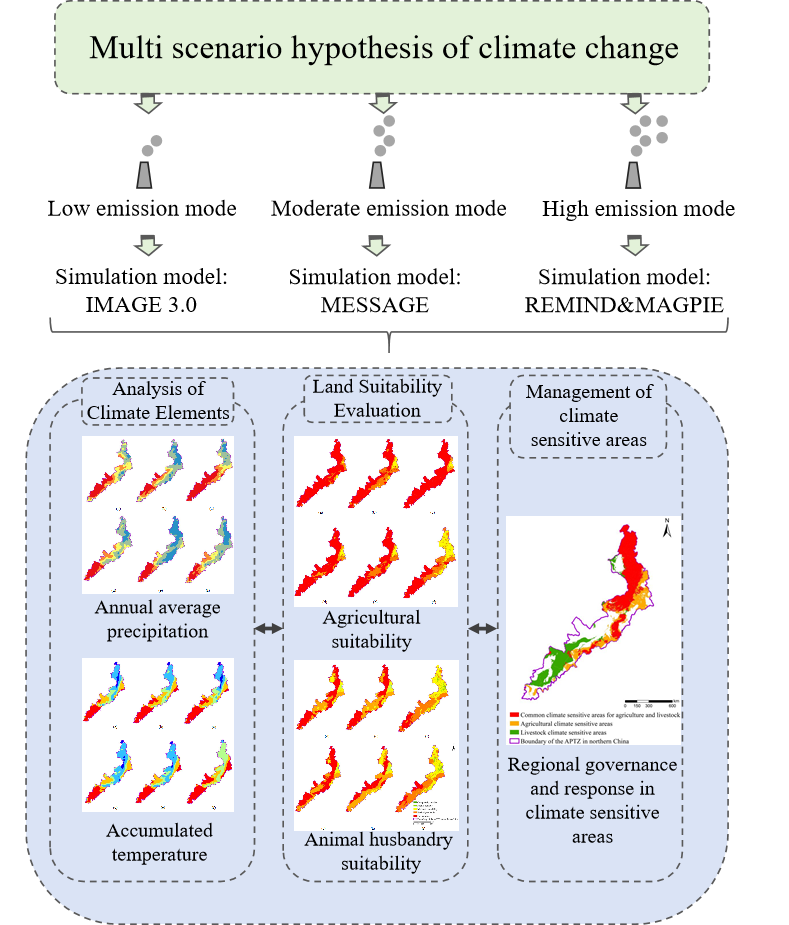

Supplement: Supplementary file 1 [file 4c0e5e8af64b15ec65592ae5.docx]
